# Supplementary material
Source: MDPI journal article supplement (https://www.mdpi.com/2673-7167/1/3/22)
Supplement: s1 [file s1]

## SUPPORTING INFORMATION

### **Acid-catalysed esterification of betaines : theoretical exploration of the impact of the carbon chain-length on the reaction mechanism**

**Richail Dubien Moulandou-Koumba<sup>1,2\*</sup>, Frédéric Guégan<sup>1\*</sup>, Jean-Maurille Ouamba<sup>2</sup>, Samuel N'Sikabaka<sup>2</sup> and Gilles Frapper<sup>1</sup>**

<sup>1</sup> IC2MP UMR 7285, Université de Poitiers – CNRS, 4, rue Michel Brunet TSA 51106–86073 Cedex 9 Poitiers, France.

<sup>2</sup> Université Marien Ngouabi, Faculté des Sciences et Techniques, Unité de Chimie du Végétal et de la Vie, BP 69 Brazzaville, Congo.

\* Correspondence: R.D.M.K, [richail.dubien.moulandou.koumba@univ-poitiers.fr](mailto:richail.dubien.moulandou.koumba@univ-poitiers.fr); F.G., [frederic.guegan@univ-poitiers.fr](mailto:frederic.guegan@univ-poitiers.fr)

**Table S1.** Total electronic energies (Ee), zero-point corrected electronic energies (EZPE), enthalpies (H298) and Gibbs free energies (G298) for gas phase structures involved in the reaction profiles.

a): Reaction profile for **GB2** + HCl + primary hydroxyl glycerol

| Structures | Ee <sup>a</sup> | EZPE         | H <sub>298</sub> | G <sub>298</sub> | ΔG <sup>b</sup> |
|------------|-----------------|--------------|------------------|------------------|-----------------|
| <b>R</b>   | -1707.784197    | -1707.808108 | -1707.783253     | -1707.864355     | 0.0             |
| <b>TS1</b> | -1707.754699    | -1707.775822 | -1707.753755     | -1707.826890     | 23.5            |
| <b>IR1</b> | -1707.767086    | -1707.789126 | -1707.766142     | -1707.842322     | 13.8            |
| <b>IR2</b> | -1707.769797    | -1707.792242 | -1707.768853     | -1707.845971     | 11.5            |
| <b>TS2</b> | -1707.756182    | -1707.777324 | -1707.755237     | -1707.82729      | 23.1            |
| <b>P</b>   | -1707.786830    | -1707.810958 | -1707.785886     | -1707.866875     | -1.6            |

b): Reaction profile for **GB3** + HCl + primary hydroxyl glycerol

| Structures | Ee <sup>a</sup> | EZPE         | H <sub>298</sub> | G <sub>298</sub> | ΔG <sup>b</sup> |
|------------|-----------------|--------------|------------------|------------------|-----------------|
| <b>R</b>   | -1747.067537    | -1747.092906 | -1747.066593     | -1747.152808     | 0.0             |
| <b>TS1</b> | -1747.052364    | -1747.074680 | -1747.051420     | -1747.127698     | 20.6            |
| <b>IR1</b> | -1747.053115    | -1747.076673 | -1747.052171     | -1747.132037     | 13.0            |
| <b>IR2</b> | -1747.053763    | -1747.077454 | -1747.052819     | -1747.132580     | 12.7            |
| <b>TS2</b> | -1747.041059    | -1747.063490 | -1747.040114     | -1747.115085     | 23.7            |
| <b>P</b>   | -1747.071143    | -1747.096295 | -1747.070199     | -1747.154539     | -1.1            |

<sup>a</sup> Electronic structure calculations at the B3LYP/6-31+G(d,p) level. All values are in atomic units (1a.u. = 627.51kcal/mol).

<sup>b</sup> Relative energies in kcal/mol.

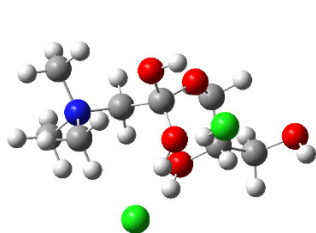

**IR1-1**

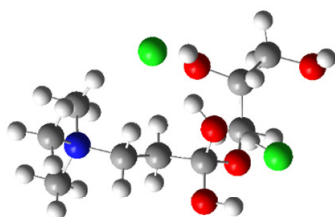

**IR1-2**

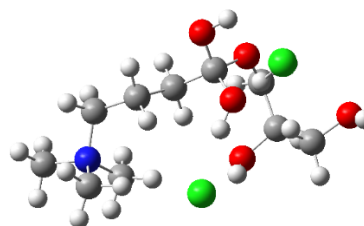

**IR1-3**

**Figure S1:** Structure of the IR1 intermediate species for betaines 1, 2 and 3, showing the molecular backbone folding in IR1-3

## Optimized structures

Betaine (zwitterion) GB2 et GB3

Gas phase HCl

Betaine hydrochloride GB2 (two structures, GB2-1 to GB2-2)

Equilibrium structures (R, IR1, IR2, P) and transition structures (TS1, TS2) for HCl-catalyzed esterification reaction profiles:

GB2 + HCl + prim-glycerol

**R1** : Betaine hydrochloride GB2-3 + HCl

**R2** : Glycerol

**R**: Pre-reactant structure, i.e., (GB2 ou GB3 + HCl + glycerol) van der Waals complexe

**TS2**: HCl-catalyzed nucleophilic addition transition structure

**IR1**: tetrahedral intermediate resulting from nucleophilic addition

**IR2**: rearranged tetrahedral intermediate

**TS2**: HCl-catalyzed H<sub>2</sub>O elimination transition structure

**P**: Product structure, i.e., (ester + HCl + H<sub>2</sub>O) Van der Waals complexe

## Cartesian Coordinates in Å

### HCl

|    |               |    |    |
|----|---------------|----|----|
| H  | -0.0933901188 | 0. | 0. |
| Cl | 1.1933901188  | 0. | 0. |

### H<sub>2</sub>O

|   |               |               |               |
|---|---------------|---------------|---------------|
| O | -2.8690237817 | -0.4159257006 | 0.0039920116  |
| H | -1.9044683755 | -0.4459520434 | -0.0062353048 |
| H | -3.1606378428 | -1.286722256  | -0.2927367067 |

### Glycerol

|   |             |             |             |
|---|-------------|-------------|-------------|
| O | -0.54915800 | 1.61917400  | 0.03209600  |
| C | 0.01272500  | 0.34713000  | -0.27521500 |
| C | 1.44738300  | 0.36037200  | 0.25730300  |
| O | 2.17262200  | -0.81555500 | -0.10109600 |
| C | -0.82425900 | -0.77188900 | 0.33025800  |
| O | -2.14262000 | -0.63178500 | -0.21965700 |
| H | -2.74678200 | -1.23680500 | 0.22701800  |
| H | -0.84774300 | -0.65670600 | 1.42329900  |
| H | -0.38869600 | -1.74602800 | 0.07799300  |
| H | 0.03594900  | 0.20335600  | -1.36959100 |
| H | -1.50099500 | 1.55689800  | -0.13728500 |
| H | 1.94590200  | 1.27062500  | -0.09903200 |
| H | 1.43832200  | 0.39192800  | 1.35098700  |

|   |            |             |             |
|---|------------|-------------|-------------|
| H | 2.40219100 | -0.77161300 | -1.03819900 |
|---|------------|-------------|-------------|

• 2CH<sub>2</sub>

Glycine Betaine (zwitterion) **GB(CH<sub>2</sub>)**

|   |             |             |             |
|---|-------------|-------------|-------------|
| N | 1.20652300  | -0.02715900 | 0.06698100  |
| C | 0.34026400  | 1.22208300  | -0.24918100 |
| H | 0.19874200  | 1.72045200  | 0.71298100  |
| C | -1.00704700 | 0.94857200  | -0.90442900 |
| C | -1.85927000 | -0.03555900 | -0.03412500 |
| O | -2.35054700 | 0.46125000  | 1.00121300  |
| O | -1.83457400 | -1.23974400 | -0.42121700 |
| H | 0.97654300  | 1.84411600  | -0.88638800 |
| H | -1.50981100 | 1.92046300  | -0.95201200 |
| H | -0.88100100 | 0.57636800  | -1.92558200 |
| C | 2.61175500  | 0.44397500  | 0.29302800  |
| C | 0.73459600  | -0.73137300 | 1.32368000  |
| C | 1.17808200  | -1.00586800 | -1.08187200 |
| H | 1.45233600  | -1.52297900 | 1.54716800  |
| H | 0.70249600  | -0.00517900 | 2.13573100  |
| H | -0.25491000 | -1.15215600 | 1.14698900  |
| H | 1.87382800  | -1.81571200 | -0.85379400 |
| H | 0.15182600  | -1.38108000 | -1.17281000 |
| H | 1.49483700  | -0.48660700 | -1.98808100 |
| H | 3.23394700  | -0.40758000 | 0.57232100  |
| H | 2.99210300  | 0.89479800  | -0.62462300 |
| H | 2.61407900  | 1.18218400  | 1.09666000  |

**GB2-1**

|    |             |             |             |
|----|-------------|-------------|-------------|
| N  | 0.62086800  | 0.29761000  | 0.00094200  |
| C  | -0.85182300 | 0.64098500  | 0.00150700  |
| H  | -1.03238800 | 1.26031200  | 0.88217100  |
| C  | -1.80751600 | -0.55233500 | 0.00043500  |
| C  | -3.25254300 | -0.05348100 | -0.00070300 |
| O  | -3.56052600 | 1.11232800  | -0.00213000 |
| O  | -4.20711200 | -1.01496700 | -0.00017900 |
| H  | -1.03270200 | 1.26212700  | -0.87779100 |
| Cl | 4.13965800  | -0.39605100 | -0.00133500 |
| H  | -1.66134600 | -1.18620800 | -0.88173700 |
| H  | -1.66264900 | -1.18670100 | 0.88245900  |
| C  | 1.40567400  | 1.59571100  | 0.00263300  |
| C  | 1.01905900  | -0.48723200 | 1.23144800  |
| H  | -3.82779800 | -1.90643400 | 0.00122400  |
| C  | 1.01894800  | -0.48390400 | -1.23174400 |
| H  | 2.11109400  | -0.61463800 | 1.18581800  |
| H  | 0.71526100  | 0.07944100  | 2.11369600  |
| H  | 0.52510500  | -1.45864200 | 1.21096900  |
| H  | 2.11103300  | -0.61136200 | -1.18636100 |
| H  | 0.52501900  | -1.45537700 | -1.21389600 |

|   |            |            |             |
|---|------------|------------|-------------|
| H | 0.71512000 | 0.08517900 | -2.11242300 |
| H | 2.47092900 | 1.32708600 | 0.00225100  |
| H | 1.13667700 | 2.15989900 | -0.89181400 |
| H | 1.13668700 | 2.15756800 | 0.89855400  |

# **GB2-2**

|    |             |             |             |
|----|-------------|-------------|-------------|
| N  | -1.12230300 | -0.06323400 | 0.13207300  |
| C  | 0.37872000  | -0.17126000 | 0.27188600  |
| H  | 0.80821800  | 0.64553500  | -0.31077300 |
| C  | 0.98157400  | -1.50761500 | -0.16496500 |
| C  | 2.49614400  | -1.49937000 | 0.01910800  |
| O  | 3.13819600  | -0.53068100 | 0.35948100  |
| O  | 3.12899900  | -2.66374100 | -0.22606200 |
| H  | 0.61072000  | 0.01649300  | 1.32252900  |
| Cl | -4.67714000 | 0.28087500  | -0.15544300 |
| Cl | 3.01436200  | 2.66542000  | -0.14251800 |
| H  | 0.56934500  | -2.34284900 | 0.41245200  |
| H  | 0.77727800  | -1.71480600 | -1.22214000 |
| H  | 3.25854000  | 1.42311700  | 0.14517200  |
| C  | -1.53865600 | 1.31538500  | 0.61269400  |
| C  | -1.56669700 | -0.20548500 | -1.30758900 |
| H  | 2.51590500  | -3.36990900 | -0.48039600 |
| C  | -1.84639600 | -1.08851200 | 0.97646900  |
| H  | -2.65339200 | -0.03142500 | -1.32049700 |
| H  | -1.03141000 | 0.53323000  | -1.90698900 |
| H  | -1.34444400 | -1.21538800 | -1.65274500 |
| H  | -2.92222500 | -0.87613600 | 0.87727900  |
| H  | -1.62498200 | -2.08622700 | 0.59708700  |
| H  | -1.50741300 | -0.98497500 | 2.00910400  |
| H  | -2.62929300 | 1.37685700  | 0.49973300  |
| H  | -1.24073000 | 1.41807500  | 1.65733600  |
| H  | -1.02846900 | 2.06054800  | 0.00071300  |

# **Betaine 2CH<sub>2</sub> protonated**

|   |               |               |               |
|---|---------------|---------------|---------------|
| C | -2.5569680683 | -0.7738854115 | 1.5049543813  |
| N | -2.491260696  | -0.4930608191 | 0.0235356447  |
| C | -3.4650312089 | 0.6058161443  | -0.3257882919 |
| C | -2.8868151512 | -1.7463040179 | -0.7246973266 |
| C | -1.0695872569 | -0.1300045751 | -0.407964116  |
| C | -0.4802192059 | 1.120531901   | 0.2403467673  |
| C | 0.9305256499  | 1.3287510241  | -0.3004878305 |
| O | 1.4941221455  | 2.4183847686  | 0.2392134797  |
| O | 1.4610839459  | 0.6006936369  | -1.109480469  |
| H | -3.561575858  | -1.1201700558 | 1.7498374693  |
| H | -1.8274972399 | -1.5465291935 | 1.7506082138  |
| H | -2.3409272908 | 0.1379886049  | 2.059299116   |
| H | -3.8992022436 | -2.0264490455 | -0.4328292169 |
| H | -2.8483135534 | -1.5456383178 | -1.7955836184 |
| H | -2.1896775302 | -2.544871354  | -0.4700709876 |
| H | -0.4506819892 | -1.0010234668 | -0.1852129259 |
| H | -1.0989074388 | -0.0173232471 | -1.4932227666 |

|   |               |              |               |
|---|---------------|--------------|---------------|
| H | -1.0536158746 | 2.0266855294 | 0.0204055902  |
| H | -0.4065100648 | 1.0430877867 | 1.3297666657  |
| H | -4.4738858547 | 0.2653095303 | -0.090456196  |
| H | -3.2357187919 | 1.4959140835 | 0.2578535423  |
| H | -3.385306806  | 0.8226699446 | -1.3916589178 |
| H | 2.3914930118  | 2.5230873797 | -0.1257115171 |

**GB (2CH2):** Active specie in Watson

|   |               |               |               |
|---|---------------|---------------|---------------|
| C | 1.8190518416  | -1.3729963466 | 1.0068654609  |
| N | 1.6655701906  | -0.0345649732 | 0.3116017081  |
| C | 2.1153428401  | -0.1541640065 | -1.1311855163 |
| C | 2.5642679548  | 0.9775096078  | 1.0130804465  |
| C | 0.2421651328  | 0.4945899233  | 0.4160242776  |
| C | -0.839632364  | -0.3913340114 | -0.2386046911 |
| C | -2.2215112296 | 0.1838371165  | -0.1023180342 |
| O | -2.3629962036 | 1.2963213875  | 0.5123801455  |
| O | -3.2816217606 | -0.3709422909 | -0.5655378879 |
| H | 2.8753370606  | -1.6431377715 | 1.0006278562  |
| H | 1.4702114658  | -1.2839692191 | 2.0367355331  |
| H | 1.2571172659  | -2.1371995107 | 0.4698756241  |
| H | 3.5925679251  | 0.6215200489  | 0.9524606827  |
| H | 2.4744288875  | 1.9412450719  | 0.5108086245  |
| H | 2.2603524093  | 1.0595649275  | 2.0571300577  |
| H | 0.0350270069  | 0.6157251883  | 1.4813391158  |
| H | 0.2462515522  | 1.4849350499  | -0.0440658138 |
| H | -0.6706265649 | -0.5296318745 | -1.3155742595 |
| H | -0.8813682912 | -1.3959002505 | 0.204820828   |
| H | 3.1718148106  | -0.4235348349 | -1.139492937  |
| H | 1.5483314742  | -0.9380031214 | -1.6334139196 |
| H | 1.9787061742  | 0.8064348236  | -1.6300082365 |
| H | -3.2908980999 | 1.6222653131  | 0.5697035418  |
| H | -3.179395878  | -1.2224559568 | -1.0369111265 |

**GB (2CH2):** Active specie in Ingold

|   |             |             |             |
|---|-------------|-------------|-------------|
| C | 2.13196800  | 1.28690600  | -0.00069900 |
| H | 1.93025400  | 1.87154800  | -0.89911100 |
| H | 1.93038100  | 1.87250700  | 0.89711700  |
| H | 3.16921500  | 0.95178600  | -0.00058800 |
| C | 1.54732700  | -0.77179500 | -1.24284300 |
| H | 2.61396100  | -0.99834900 | -1.24162000 |
| H | 0.99243300  | -1.71059600 | -1.22092900 |
| H | 1.29915100  | -0.18683300 | -2.12990500 |
| C | 1.54761400  | -0.77056200 | 1.24361400  |
| H | 1.29965600  | -0.18471500 | 2.13015100  |
| H | 0.99271500  | -1.70938200 | 1.22278600  |
| H | 2.61424100  | -0.99714000 | 1.24235000  |
| C | -0.19179600 | 0.55456900  | -0.00009900 |
| H | -0.31217900 | 1.17659200  | -0.88966100 |
| H | -0.31224000 | 1.17686300  | 0.88926500  |
| C | -1.26985400 | -0.58347700 | -0.00004200 |

|   |             |             |             |
|---|-------------|-------------|-------------|
| H | -1.22651100 | -1.22920200 | 0.89231400  |
| H | -1.22660200 | -1.22912800 | -0.89246400 |
| N | 1.23723800  | 0.04478100  | 0.00001400  |
| C | -2.61660900 | -0.04455600 | 0.00011900  |
| O | -3.66462900 | 0.35700900  | -0.00001200 |

**R (Esterification of GB2 + HCl + primary glycerol)**

|    |             |             |             |
|----|-------------|-------------|-------------|
| C  | 4.06550000  | 0.93403700  | 1.57559000  |
| N  | 3.48436100  | 0.22982300  | 0.38514800  |
| C  | 2.91752100  | -1.10911100 | 0.81100700  |
| C  | 4.56560600  | -0.02282500 | -0.63387700 |
| C  | 2.42372700  | 1.10312200  | -0.30109500 |
| C  | 1.15344800  | 1.32194100  | 0.51509200  |
| C  | 0.00322000  | 1.89940900  | -0.31488400 |
| O  | -0.33290200 | 1.30867600  | -1.44388200 |
| O  | -0.62065300 | 2.86796600  | 0.10443300  |
| O  | -0.27932400 | -1.28353700 | 2.06218100  |
| C  | -0.76621100 | -2.29239100 | 1.15027600  |
| C  | -1.84582400 | -1.78040600 | 0.17734600  |
| C  | -3.22172200 | -1.71345500 | 0.84274300  |
| O  | -4.20788600 | -1.02300900 | 0.10152800  |
| O  | -1.91986300 | -2.65452600 | -0.93546600 |
| Cl | -3.68993900 | 2.58322600  | 0.01377400  |
| Cl | 0.97117700  | -1.30689300 | -2.08936000 |
| H  | 4.83563300  | 0.30101000  | 2.01893600  |
| H  | 4.50061600  | 1.88151900  | 1.25359800  |
| H  | 3.27615500  | 1.11435400  | 2.30433600  |
| H  | 5.36220800  | -0.60381400 | -0.16709600 |
| H  | 4.12679800  | -0.57715600 | -1.46478400 |
| H  | 4.95574100  | 0.93461300  | -0.98215800 |
| H  | 2.92444800  | 2.04949600  | -0.52440800 |
| H  | 2.19383000  | 0.57535400  | -1.22869100 |
| H  | 0.76872100  | 0.37885900  | 0.92269100  |
| H  | 1.30436700  | 2.01464600  | 1.34533900  |
| H  | -2.39448300 | 2.80496900  | -0.09404400 |
| H  | 3.75135000  | -1.73062300 | 1.14154800  |
| H  | 2.20975600  | -0.96769800 | 1.62685400  |
| H  | 2.40861100  | -1.54688800 | -0.05277900 |
| H  | -0.98673100 | -1.04657400 | 2.67602300  |
| H  | 0.10065400  | -2.59924000 | 0.56292600  |
| H  | -1.12916600 | -3.16664700 | 1.70797600  |
| H  | -1.55972700 | -0.76810300 | -0.14416100 |
| H  | -1.17149100 | -2.44932400 | -1.52431500 |
| H  | 0.12722600  | 0.42763700  | -1.65373700 |
| H  | -3.59519300 | -2.73551300 | 0.96783600  |
| H  | -3.11234100 | -1.27147700 | 1.85080400  |
| H  | -3.95512800 | -0.09230500 | 0.00270000  |

**TS1-2 (Esterification of GB2 + HCl + primary glycerol)**

|   |             |             |            |
|---|-------------|-------------|------------|
| C | -4.41822700 | -1.36501200 | 1.01009300 |
|---|-------------|-------------|------------|

|    |             |             |             |
|----|-------------|-------------|-------------|
| N  | -3.84735600 | -0.25364200 | 0.17635700  |
| C  | -3.71733800 | 1.00243200  | 1.01176500  |
| C  | -4.77796100 | 0.03787700  | -0.97318400 |
| C  | -2.50222700 | -0.66624200 | -0.43112200 |
| C  | -1.33950800 | -0.72501200 | 0.55893500  |
| C  | -0.05785300 | -1.00345600 | -0.23000800 |
| O  | 0.21265700  | -0.20985900 | -1.25710900 |
| O  | 0.10494900  | -2.30726300 | -0.45723700 |
| O  | 1.14413800  | -0.69419900 | 0.97416400  |
| C  | 1.51988700  | 0.70126200  | 1.22947600  |
| C  | 2.57423100  | 1.27138200  | 0.26221800  |
| C  | 4.02020300  | 0.87065400  | 0.62913000  |
| O  | 4.79668800  | 0.48145300  | -0.48844300 |
| O  | 2.47449900  | 2.69514900  | 0.32152700  |
| Cl | 3.07226000  | -2.38759800 | -0.30605900 |
| Cl | -1.05953600 | 2.42119700  | -0.82185300 |
| H  | -5.36911400 | -1.03681800 | 1.43246100  |
| H  | -4.57105500 | -2.24154300 | 0.37894000  |
| H  | -3.72216000 | -1.60412900 | 1.81317000  |
| H  | -5.77135700 | 0.25450200  | -0.57803400 |
| H  | -4.39138600 | 0.89950300  | -1.51844300 |
| H  | -4.81631300 | -0.83414700 | -1.62729400 |
| H  | -2.66932700 | -1.63311000 | -0.91195600 |
| H  | -2.28740800 | 0.09124500  | -1.18544100 |
| H  | -1.22897500 | 0.23820900  | 1.05593000  |
| H  | -1.44154500 | -1.51859700 | 1.30154200  |
| H  | 1.04385800  | -2.49487300 | -0.75744100 |
| H  | -4.72178100 | 1.37649200  | 1.21488700  |
| H  | -3.22356000 | 0.75398200  | 1.95015200  |
| H  | -3.11742800 | 1.73132000  | 0.45567100  |
| H  | 1.95713300  | -1.27208800 | 0.63971600  |
| H  | 0.60246700  | 1.28672800  | 1.14881800  |
| H  | 1.86577300  | 0.73190200  | 2.26737200  |
| H  | 2.36920200  | 0.91080400  | -0.75108700 |
| H  | 1.65308000  | 2.96835200  | -0.11954800 |
| H  | -0.15803100 | 0.73337700  | -1.14227200 |
| H  | 4.50359800  | 1.74897400  | 1.06766600  |
| H  | 4.01276300  | 0.07121900  | 1.38425700  |
| H  | 4.52605900  | -0.42254700 | -0.72608500 |

**IR1-2 (Esterification of GB2 + HCl + primary glycerol)**

|   |             |             |             |
|---|-------------|-------------|-------------|
| C | -4.23988000 | -1.10338400 | 0.29221600  |
| N | -3.55304200 | 0.22125700  | 0.12717300  |
| C | -3.19844800 | 0.78986400  | 1.48460500  |
| C | -4.48279300 | 1.18611600  | -0.55921100 |
| C | -2.30982200 | 0.08234500  | -0.76428500 |
| C | -1.13864100 | -0.64264900 | -0.11547400 |
| C | 0.10503600  | -0.56437100 | -1.03193600 |
| O | 0.31566400  | 0.67647600  | -1.59126100 |
| O | -0.08055300 | -1.49333800 | -2.04967000 |



|    |             |             |             |
|----|-------------|-------------|-------------|
| O  | 1.26943900  | -1.01971300 | -0.29904400 |
| C  | 1.79886400  | -0.13699600 | 0.72247900  |
| C  | 2.85367900  | 0.86510700  | 0.20717400  |
| C  | 4.22059000  | 0.20317800  | 0.07187300  |
| O  | 5.20249200  | 1.01050000  | -0.56935400 |
| O  | 2.94812000  | 1.93973500  | 1.13138000  |
| Cl | 0.83199100  | -3.79260500 | 0.90840800  |
| Cl | -0.46249100 | 2.76649200  | 0.44520300  |
| H  | -5.11238200 | -0.97207100 | 0.93425800  |
| H  | -4.54752300 | -1.46911000 | -0.68850600 |
| H  | -3.54852200 | -1.81019500 | 0.74936200  |
| H  | -5.41306700 | 1.24781700  | 0.00748600  |
| H  | -3.99787400 | 2.16212200  | -0.59724700 |
| H  | -4.68236000 | 0.82699800  | -1.56969900 |
| H  | -2.64317800 | -0.42412900 | -1.67305000 |
| H  | -2.01531100 | 1.10502600  | -0.99829300 |
| H  | -0.88362500 | -0.16103400 | 0.82798500  |
| H  | -1.33723900 | -1.70252900 | 0.06309900  |
| H  | 0.61314700  | -1.33893500 | -2.70925900 |
| H  | -4.12518800 | 1.09043700  | 1.97594000  |
| H  | -2.70597200 | 0.01795400  | 2.07394100  |
| H  | -2.52033000 | 1.63914500  | 1.34182900  |
| H  | 1.06623100  | -2.63950100 | 0.29500200  |
| H  | 0.99212200  | 0.43409400  | 1.18849000  |
| H  | 2.23269700  | -0.79531200 | 1.48206600  |
| H  | 2.53382300  | 1.22765700  | -0.77947300 |
| H  | 2.12650500  | 2.45918800  | 1.07583500  |
| H  | 0.13526100  | 1.42125800  | -0.94291800 |
| H  | 4.61580400  | -0.01115500 | 1.07019900  |
| H  | 4.09207000  | -0.75173800 | -0.46132600 |
| H  | 4.82191500  | 1.35459600  | -1.38836900 |

**IR2-2 (Esterification of GB1 + HCl + primary glycerol)**

|    |             |             |             |
|----|-------------|-------------|-------------|
| C  | -4.27443000 | 0.32056400  | 0.67179500  |
| N  | -3.34396300 | -0.37780900 | -0.28523100 |
| C  | -2.99935500 | -1.73056600 | 0.29718900  |
| C  | -2.10145900 | 0.51757100  | -0.43372900 |
| C  | -0.89995400 | -0.15661500 | -1.08425300 |
| C  | 0.33058400  | 0.76883800  | -1.00448500 |
| O  | 0.00201700  | 1.92414800  | -1.72204200 |
| C  | -4.02339200 | -0.55542100 | -1.61026700 |
| O  | 1.46303700  | 0.23516000  | -1.64143300 |
| C  | 1.94659500  | -1.09605500 | -1.37404700 |
| C  | 2.13920300  | -1.52402400 | 0.08626800  |
| O  | 0.93929500  | -2.12151000 | 0.58583400  |
| O  | 0.66477000  | 1.13077400  | 0.31852300  |
| C  | 3.24824100  | -2.58596800 | 0.18497700  |
| O  | 4.52299400  | -2.11428200 | -0.24926600 |
| Cl | -0.74074100 | -0.34513300 | 2.57782000  |
| Cl | 2.05997200  | 3.84324300  | 0.64460800  |
| H  | -2.42740000 | 1.39242300  | -0.99973900 |

|   |             |             |             |
|---|-------------|-------------|-------------|
| H | -1.85079700 | 0.81077200  | 0.58553000  |
| H | -0.63816800 | -1.08305500 | -0.57110400 |
| H | -1.06316200 | -0.36040400 | -2.14700300 |
| H | 0.78471200  | 2.49720700  | -1.74529600 |
| H | 1.45992000  | 2.66696000  | 0.63728100  |
| H | 1.29058100  | -1.83375100 | -1.85838000 |
| H | 2.91428600  | -1.11063500 | -1.87943100 |
| H | 0.19383200  | 0.63692900  | 1.04911500  |
| H | 2.41990700  | -0.65113700 | 0.68778900  |
| H | 0.61082800  | -1.66016400 | 1.38660600  |
| H | 3.28197200  | -2.95439100 | 1.21809200  |
| H | 3.00524100  | -3.43564700 | -0.46175600 |
| H | 4.84949500  | -1.45986600 | 0.38238000  |
| H | -3.93478200 | -2.23687700 | 0.54155700  |
| H | -2.44842200 | -2.30879700 | -0.44255300 |
| H | -2.38490700 | -1.57206300 | 1.18956600  |
| H | -5.20474900 | -0.24571800 | 0.73945200  |
| H | -3.78451700 | 0.36922200  | 1.64549000  |
| H | -4.47307600 | 1.32642200  | 0.29911300  |
| H | -4.89530700 | -1.19845400 | -1.47941500 |
| H | -4.33130800 | 0.42107100  | -1.98679900 |
| H | -3.32645600 | -1.01749300 | -2.30877800 |

**TS2-2 (Esterification of GB2 + HCl + primary glycerol)**

|    |             |             |             |
|----|-------------|-------------|-------------|
| C  | -4.19328700 | -0.12945400 | 0.54472500  |
| N  | -3.19129400 | -0.58353400 | -0.48872100 |
| C  | -2.76600500 | -1.99315400 | -0.14196700 |
| C  | -2.02040500 | 0.40762600  | -0.43317800 |
| C  | -0.73576200 | -0.08395300 | -1.09086000 |
| C  | 0.36325500  | 0.96140200  | -0.93371300 |
| O  | -0.03592200 | 2.17815400  | -1.21036100 |
| C  | -3.82730400 | -0.56754100 | -1.84759200 |
| O  | 1.59086100  | 0.66783200  | -1.37396900 |
| C  | 2.16134500  | -0.67125400 | -1.33600400 |
| C  | 2.34243800  | -1.31692300 | 0.04166700  |
| O  | 1.16556600  | -2.03761400 | 0.41563800  |
| O  | 0.67970100  | 0.98697300  | 0.84376200  |
| C  | 3.49755800  | -2.33401900 | -0.01334700 |
| O  | 4.74377200  | -1.74834000 | -0.37970100 |
| Cl | -0.93559000 | -0.79914300 | 2.57238700  |
| Cl | 1.25827800  | 3.85617500  | 0.66861300  |
| H  | -2.37809200 | 1.33095000  | -0.89094600 |
| H  | -1.84275800 | 0.56948500  | 0.62899600  |
| H  | -0.38782900 | -1.01920500 | -0.65176600 |
| H  | -0.85252400 | -0.21706600 | -2.17427900 |
| H  | 0.53457600  | 2.91555000  | -0.72070300 |
| H  | 0.86976100  | 1.95923100  | 1.06840300  |
| H  | 1.56671200  | -1.33591300 | -1.97403600 |
| H  | 3.13912500  | -0.52075400 | -1.79401500 |
| H  | 0.07123200  | 0.53167500  | 1.50959700  |
| H  | 2.57400100  | -0.53690000 | 0.77417400  |

|   |             |             |             |
|---|-------------|-------------|-------------|
| H | 0.78724500  | -1.71770000 | 1.25936400  |
| H | 3.55241100  | -2.84116800 | 0.95781300  |
| H | 3.28519900  | -3.09517100 | -0.77146400 |
| H | 5.07179700  | -1.20854400 | 0.35171900  |
| H | -3.66856700 | -2.59841900 | -0.04295800 |
| H | -2.14427700 | -2.38720200 | -0.94444200 |
| H | -2.20780500 | -1.95838400 | 0.79891500  |
| H | -5.08081500 | -0.76023500 | 0.47537000  |
| H | -3.72831900 | -0.22347600 | 1.52785100  |
| H | -4.45437900 | 0.91104500  | 0.34663400  |
| H | -4.65074800 | -1.28319600 | -1.86205400 |
| H | -4.20054100 | 0.43618100  | -2.05498800 |
| H | -3.08484500 | -0.84801000 | -2.59447000 |

**P (Esterification of GB2 + HCl + primary glycerol)**

|    |             |             |             |
|----|-------------|-------------|-------------|
| C  | -3.71362800 | 0.47480100  | 0.88277700  |
| N  | -3.04453900 | 0.17644300  | -0.44049100 |
| C  | -3.05320600 | -1.32118600 | -0.64026000 |
| C  | -1.61691600 | 0.72078900  | -0.34492400 |
| C  | -0.72784800 | 0.45351300  | -1.56269700 |
| C  | 0.59453300  | 1.18028300  | -1.31020300 |
| O  | 0.58270700  | 2.38476800  | -1.09406500 |
| C  | -3.80467600 | 0.84524300  | -1.54530800 |
| O  | 1.75879100  | 0.54398100  | -1.36197600 |
| C  | 1.95216200  | -0.88901800 | -1.54211400 |
| C  | 1.66912700  | -1.71599800 | -0.29009500 |
| O  | 0.29271400  | -2.08118800 | -0.27101500 |
| O  | 0.82498300  | 0.62290700  | 1.81824800  |
| C  | 2.52447100  | -2.99583700 | -0.29327500 |
| O  | 3.92616700  | -2.72849500 | -0.28378000 |
| Cl | -1.26132700 | -1.64078200 | 2.39182800  |
| Cl | 2.35309900  | 3.80336100  | 1.04395100  |
| H  | -1.71286900 | 1.79494900  | -0.17716700 |
| H  | -1.18659200 | 0.25962100  | 0.54461600  |
| H  | -0.57946300 | -0.61530900 | -1.69684200 |
| H  | -1.13837200 | 0.90140200  | -2.47489000 |
| H  | 1.71909600  | 3.18266200  | 0.07420900  |
| H  | 1.15623300  | 1.30867500  | 2.41137600  |
| H  | 1.35459800  | -1.24754900 | -2.38691500 |
| H  | 3.00977900  | -0.95694600 | -1.79767300 |
| H  | 0.26515200  | 0.01062400  | 2.34034900  |
| H  | 1.91564500  | -1.10245400 | 0.58633200  |
| H  | -0.06413200 | -2.06295500 | 0.65014000  |
| H  | 2.22226600  | -3.61402800 | 0.56134800  |
| H  | 2.33147600  | -3.57302400 | -1.20379800 |
| H  | 4.17523200  | -2.38130500 | 0.58305000  |
| H  | -4.09311900 | -1.65239200 | -0.64944000 |
| H  | -2.57722500 | -1.55993900 | -1.58978900 |
| H  | -2.51034300 | -1.77445500 | 0.19331900  |
| H  | -4.74253000 | 0.11409000  | 0.83790800  |
| H  | -3.15405800 | -0.04661100 | 1.66560000  |

|   |             |            |             |
|---|-------------|------------|-------------|
| H | -3.69899900 | 1.55369200 | 1.04378100  |
| H | -4.83955500 | 0.50101800 | -1.51849000 |
| H | -3.76753200 | 1.92591600 | -1.39956200 |
| H | -3.36004600 | 0.58404700 | -2.50497000 |

• 3CH<sub>2</sub>

**Betaine 3CH<sub>2</sub> protonated**

|   |               |               |               |
|---|---------------|---------------|---------------|
| C | -0.4148643654 | -1.1851689344 | 0.252868444   |
| C | -1.8666857962 | -1.219484012  | -0.2506948373 |
| C | -2.5810475405 | 0.1058390222  | -0.0543801844 |
| O | -3.8728398304 | 0.0296082485  | -0.4007710873 |
| O | -2.0523941348 | 1.1203940342  | 0.3632619771  |
| H | -0.0274132502 | -2.2079196132 | 0.2745467113  |
| H | -0.426563429  | -0.8118179115 | 1.2802983281  |
| H | -1.9309580737 | -1.4939052737 | -1.3112665099 |
| H | -2.4308204837 | -1.9904905148 | 0.2843668829  |
| C | 0.4570992011  | -0.2991433691 | -0.6427654131 |
| H | -0.0706272075 | 0.6207733409  | -0.8960379331 |
| H | 0.7230746949  | -0.823304213  | -1.564939822  |
| N | 1.783728198   | 0.1615647759  | -0.0286415787 |
| C | 2.615205289   | -1.0147115642 | 0.4128333018  |
| H | 2.0959841382  | -1.546022502  | 1.208918713   |
| H | 2.7731494404  | -1.6766572891 | -0.4397015578 |
| H | 3.574060647   | -0.647854385  | 0.7807754244  |
| C | 1.5396937359  | 1.082975882   | 1.1448411443  |
| H | 0.8806945247  | 1.8909046926  | 0.8275244549  |
| H | 1.0716794669  | 0.5271713413  | 1.9544691635  |
| H | 2.500078841   | 1.4780739998  | 1.4772865103  |
| C | 2.5405814701  | 0.9273443661  | -1.0871007623 |
| H | 2.7334312587  | 0.2679006318  | -1.9337638615 |
| H | 1.937636087   | 1.7781508107  | -1.4055861005 |
| H | 3.4834998013  | 1.2765311947  | -0.6652481716 |
| H | -4.2898694329 | 0.8977768513  | -0.2558646861 |

**Active specie in Watson**

|   |               |               |               |
|---|---------------|---------------|---------------|
| C | -0.0458564067 | -0.7074658614 | -0.0011808044 |
| H | 0.1475667999  | -1.3217725532 | -0.8845700385 |
| H | 0.1511177851  | -1.3218612718 | 0.8813610954  |
| C | 0.9285336348  | 0.4924836987  | -0.0030786471 |
| H | 0.7765391894  | 1.138553956   | 0.8750439901  |
| H | 0.7731759171  | 1.1385166313  | -0.8806356189 |
| C | 2.3794990803  | 0.1223473038  | -0.0058301481 |
| O | 3.3423705799  | 0.9752398438  | -0.0077777227 |
| H | 3.0932375149  | 1.920898398   | -0.0073951663 |
| O | 2.7041983405  | -1.1157204357 | -0.0063388256 |
| H | 3.6741627921  | -1.2800640388 | -0.0081843308 |
| N | -2.5859899066 | -1.2574466627 | 0.0034414776  |
| C | -2.5083689519 | -2.1285588656 | 1.2389009406  |
| H | -3.3675829334 | -2.7996509216 | 1.241021152   |
| H | -1.5933394761 | -2.7188918734 | 1.216718633   |

|   |               |               |               |
|---|---------------|---------------|---------------|
| H | -2.5364893166 | -1.4936539364 | 2.1254375339  |
| C | -2.5134302877 | -2.1271689099 | -1.2332979726 |
| H | -1.5983526882 | -2.7175762614 | -1.2155118824 |
| H | -3.3726763585 | -2.7982240029 | -1.2326814619 |
| H | -2.5451263207 | -1.4912700453 | -2.1190004914 |
| C | -3.9239647786 | -0.5371751989 | 0.006570033   |
| H | -4.718974396  | -1.2828577986 | 0.0078277234  |
| H | -3.993996971  | 0.0805158173  | 0.9024778426  |
| H | -3.9976889625 | 0.0814306865  | -0.8884106494 |
| C | -1.4940500849 | -0.1894861585 | 0.001812738   |
| H | -1.6807289739 | 0.4250410816  | 0.887046127   |
| H | -1.6841640309 | 0.425853798   | -0.8821254365 |

#### Active specie in Ingold

|   |               |               |               |
|---|---------------|---------------|---------------|
| C | -0.3718835412 | 0.6513065808  | 0.0005448375  |
| H | -0.6052829948 | 1.2434777838  | -0.8876365996 |
| H | -0.6035917213 | 1.2455123363  | 0.8878097293  |
| C | -1.2794201628 | -0.6293952466 | 0.002902819   |
| H | -1.1256617669 | -1.2620795578 | 0.8931220308  |
| H | -1.1269901804 | -1.2644142659 | -0.8858846446 |
| C | -2.6912113761 | -0.3123697116 | 0.003524923   |
| O | -3.7865931127 | -0.062925219  | 0.0040188933  |
| C | 1.1011317685  | 0.192986132   | -0.0004336453 |
| H | 1.3110662084  | -0.4131529822 | -0.8861278084 |
| H | 1.3125795178  | -0.4124579635 | 0.8853759374  |
| N | 2.1368756416  | 1.3117285741  | -0.0017474724 |
| C | 2.0219844855  | 2.1783236241  | -1.2400212204 |
| H | 2.078768971   | 1.5452669326  | -2.1266492681 |
| H | 1.084508605   | 2.7331490904  | -1.2181328848 |
| H | 2.8524726961  | 2.884668234   | -1.2412695618 |
| C | 2.025073671   | 2.1783561053  | 1.2368002976  |
| H | 1.0871467672  | 2.732516816   | 1.2177016555  |
| H | 2.0849662239  | 1.5454049005  | 2.1232934104  |
| H | 2.8550494549  | 2.8853034103  | 1.2354793746  |
| C | 3.5085109689  | 0.6497918556  | -0.0034187748 |
| H | 4.2668164631  | 1.432772672   | -0.0040449654 |
| H | 3.6078124152  | 0.0370236311  | -0.9000348918 |
| H | 3.6097779183  | 0.0365615478  | 0.892661008   |

#### R (Esterification of GB3 + HCl + primary glycerol)

|   |             |             |             |
|---|-------------|-------------|-------------|
| C | 2.50434000  | 0.99263100  | 1.52336700  |
| C | 0.97470900  | 0.84662800  | 1.76407400  |
| C | 0.13592300  | 1.36478600  | 0.60580100  |
| O | -0.06039500 | 0.59685200  | -0.45246800 |
| O | -0.30469100 | 2.51222100  | 0.61641800  |
| O | -2.07344700 | -0.36602200 | 2.21079000  |
| C | -2.37908000 | -1.60391600 | 1.54697500  |
| C | -2.79202700 | -1.41574700 | 0.07542700  |
| C | -4.24202900 | -0.94860700 | -0.05963400 |
| O | -4.55112000 | -0.35533400 | -1.31114100 |

|    |             |             |             |
|----|-------------|-------------|-------------|
| O  | -2.64681400 | -2.64633500 | -0.62515000 |
| Cl | -2.85665000 | 2.97843600  | -1.01656400 |
| Cl | 0.83232600  | -2.22792300 | -0.58836800 |
| H  | 2.97906300  | 1.16096200  | 2.49452500  |
| H  | 2.69454400  | 1.90782200  | 0.95158100  |
| H  | 0.71297600  | -0.19236700 | 1.98189400  |
| H  | 0.69241800  | 1.44856400  | 2.62877400  |
| H  | -1.70327800 | 2.78736700  | -0.38879300 |
| H  | -2.87643300 | 0.16715300  | 2.27436400  |
| H  | -1.45614400 | -2.18734200 | 1.57720400  |
| H  | -3.15061700 | -2.16211100 | 2.09748000  |
| H  | -2.14241000 | -0.64567000 | -0.35936200 |
| H  | -1.69957000 | -2.78207800 | -0.79617900 |
| H  | 0.22748300  | -0.37086600 | -0.36970600 |
| H  | -4.90045400 | -1.81755700 | 0.04060800  |
| H  | -4.48059900 | -0.25041900 | 0.76199000  |
| H  | -4.05121000 | 0.47045100  | -1.39474600 |
| C  | 5.08393600  | 0.86831400  | -0.25284500 |
| H  | 5.62000300  | 0.95511600  | -1.19913000 |
| H  | 4.73596100  | 1.85177600  | 0.06179200  |
| H  | 5.74078100  | 0.44562500  | 0.50891200  |
| C  | 4.38634300  | -1.40254000 | -0.89242700 |
| H  | 4.92290800  | -1.28745300 | -1.83540800 |
| H  | 5.05195700  | -1.80987300 | -0.13015500 |
| H  | 3.50967900  | -2.04287000 | -1.01897800 |
| C  | 3.00148200  | 0.50838100  | -1.51781300 |
| H  | 2.62088900  | 1.48160300  | -1.21335900 |
| H  | 3.58884600  | 0.61057100  | -2.43165100 |
| H  | 2.18038500  | -0.19448600 | -1.66318900 |
| C  | 3.16073300  | -0.25001700 | 0.88564000  |
| H  | 2.41854300  | -1.02319600 | 0.66171400  |
| H  | 3.91340200  | -0.67707500 | 1.55323200  |
| N  | 3.90716400  | -0.04184400 | -0.44122000 |

**TS1-3 (Esterification of GB3 + HCl + primary glycerol)**

|    |             |             |             |
|----|-------------|-------------|-------------|
| C  | -2.28067400 | -1.34118800 | 1.14721000  |
| C  | -0.81657400 | -1.08458400 | 1.59742000  |
| C  | 0.14551600  | -1.18177800 | 0.42121900  |
| O  | 0.00853900  | -0.34168000 | -0.60154200 |
| O  | 0.34769900  | -2.44618400 | 0.06038700  |
| O  | 1.67141700  | -0.77495200 | 1.18249000  |
| C  | 1.99547500  | 0.64201600  | 1.37972700  |
| C  | 2.67620000  | 1.30861500  | 0.16943800  |
| C  | 4.18339700  | 0.99023200  | 0.07847200  |
| O  | 4.62962900  | 0.75879800  | -1.24510400 |
| O  | 2.51944700  | 2.71870300  | 0.30930500  |
| Cl | 3.14832500  | -2.22831100 | -0.84870900 |
| Cl | -0.91723800 | 2.42855500  | -0.13512500 |
| H  | -2.79803800 | -1.89309900 | 1.93724300  |
| H  | -2.26290700 | -2.01030000 | 0.28185900  |
| H  | -0.72852800 | -0.10620600 | 2.07678700  |

|   |             |             |             |
|---|-------------|-------------|-------------|
| H | -0.50511300 | -1.84151700 | 2.31831700  |
| H | 1.14973900  | -2.51334700 | -0.54561900 |
| H | 2.35508600  | -1.24673500 | 0.55808500  |
| H | 1.05317800  | 1.14821500  | 1.59603300  |
| H | 2.62618600  | 0.68703600  | 2.27314500  |
| H | 2.19875900  | 0.95508300  | -0.75113800 |
| H | 1.59700900  | 2.94678200  | 0.09960700  |
| H | -0.24807800 | 0.60941900  | -0.35770300 |
| H | 4.72790400  | 1.86136000  | 0.45586100  |
| H | 4.42873700  | 0.12977100  | 0.71785900  |
| H | 4.34303800  | -0.13853400 | -1.48903000 |
| C | -4.94676000 | -1.04751700 | -0.39299200 |
| H | -5.56496400 | -0.95061300 | -1.28675300 |
| H | -4.47611800 | -2.03015200 | -0.37768900 |
| H | -5.56021500 | -0.91498300 | 0.49961400  |
| C | -4.52898500 | 1.37723700  | -0.47058100 |
| H | -5.12161100 | 1.44826800  | -1.38377700 |
| H | -5.17130100 | 1.49859200  | 0.40269600  |
| H | -3.73338600 | 2.12579000  | -0.46756600 |
| C | -3.02980300 | -0.14186300 | -1.65402500 |
| H | -2.51680800 | -1.10093300 | -1.63035900 |
| H | -3.68610900 | -0.08811600 | -2.52398200 |
| H | -2.30130100 | 0.66979800  | -1.66485700 |
| C | -3.03958900 | -0.03111900 | 0.86238900  |
| H | -2.35552200 | 0.81712900  | 0.75858200  |
| H | -3.74219900 | 0.19375700  | 1.66938400  |
| N | -3.88557000 | 0.01165500  | -0.41648200 |

**IR1-3 (Esterification of GB3 + HCl + primary glycerol)**

|    |             |             |             |
|----|-------------|-------------|-------------|
| C  | -2.22053600 | -1.49382100 | 0.98401600  |
| C  | -0.77275400 | -1.32110400 | 1.49721600  |
| C  | 0.25725600  | -1.26712000 | 0.34862400  |
| O  | -0.12491200 | -0.50267500 | -0.74958600 |
| O  | 0.39817100  | -2.57467600 | -0.10232500 |
| O  | 1.54786500  | -0.86979100 | 0.85784300  |
| C  | 1.70365500  | 0.51280100  | 1.27302900  |
| C  | 2.50730500  | 1.35786800  | 0.26175000  |
| C  | 4.01678400  | 1.18544700  | 0.46143000  |
| O  | 4.79571000  | 1.54056500  | -0.67407100 |
| O  | 2.19995600  | 2.73086200  | 0.44720500  |
| Cl | 3.73306200  | -2.23873500 | -0.89473600 |
| Cl | -1.00586100 | 2.41441500  | -0.43875900 |
| H  | -2.78409300 | -2.13080400 | 1.67367000  |
| H  | -2.17312300 | -2.02661700 | 0.03061000  |
| H  | -0.69108300 | -0.42387800 | 2.11757700  |
| H  | -0.48461400 | -2.16942300 | 2.12254100  |
| H  | 0.85220700  | -2.54529200 | -0.95937300 |
| H  | 2.86378200  | -1.67819800 | -0.07196500 |
| H  | 0.72568400  | 0.98050900  | 1.40514000  |
| H  | 2.20228900  | 0.48933100  | 2.24838100  |
| H  | 2.23573200  | 1.02794500  | -0.75183500 |

|   |             |             |             |
|---|-------------|-------------|-------------|
| H | 1.29220600  | 2.89061700  | 0.12697300  |
| H | -0.27256500 | 0.46326600  | -0.56172900 |
| H | 4.32546000  | 1.85755000  | 1.26861100  |
| H | 4.23853700  | 0.15526100  | 0.77152500  |
| H | 4.71347100  | 0.83539500  | -1.33011700 |
| C | -5.02355600 | -1.01182800 | -0.14002500 |
| H | -5.77106000 | -0.84345500 | -0.91697700 |
| H | -4.59346100 | -2.00671200 | -0.25179500 |
| H | -5.48338900 | -0.91464700 | 0.84491900  |
| C | -4.52826600 | 1.39977900  | -0.16708900 |
| H | -5.24312600 | 1.53979000  | -0.97954900 |
| H | -5.03280500 | 1.49292000  | 0.79571300  |
| H | -3.70857600 | 2.11905900  | -0.24410100 |
| C | -3.28142100 | -0.10237500 | -1.63164500 |
| H | -2.81007500 | -1.07814200 | -1.72513700 |
| H | -4.05563300 | 0.02046000  | -2.39096400 |
| H | -2.52729300 | 0.68352800  | -1.70693100 |
| C | -2.90771300 | -0.12780000 | 0.85086300  |
| H | -2.19034700 | 0.67295000  | 0.64946300  |
| H | -3.44965300 | 0.12346500  | 1.76764700  |
| N | -3.93996100 | 0.01331400  | -0.27491900 |

**IR2-3 (Esterification of GB3 + HCl + primary glycerol)**

|    |             |             |             |
|----|-------------|-------------|-------------|
| C  | -1.68293900 | 1.14486200  | -0.87874100 |
| C  | -0.54207000 | 0.20426900  | -1.29678000 |
| C  | 0.84286300  | 0.83416400  | -1.08877700 |
| O  | 0.86585600  | 2.02453100  | -1.82159200 |
| O  | 1.89734700  | 0.05723200  | -1.61219700 |
| C  | 2.03044200  | -1.34714500 | -1.33554400 |
| C  | 2.05133500  | -1.79586300 | 0.13182000  |
| O  | 0.73166500  | -2.13144100 | 0.57165300  |
| O  | 1.12051700  | 1.12505500  | 0.26767000  |
| C  | 2.90975200  | -3.06217800 | 0.29213700  |
| O  | 4.27547400  | -2.87244800 | -0.07609100 |
| Cl | -0.72020700 | -0.03917200 | 2.41074100  |
| Cl | 3.01614500  | 3.44536200  | 0.85488900  |
| H  | -1.58064700 | 2.07548500  | -1.44654200 |
| H  | -1.58588200 | 1.42012800  | 0.17466000  |
| H  | -0.56082800 | -0.73728600 | -0.74787700 |
| H  | -0.61931600 | -0.01981100 | -2.36734500 |
| H  | 1.76839600  | 2.37776400  | -1.78820300 |
| H  | 2.16873000  | 2.43990600  | 0.70013800  |
| H  | 1.24055000  | -1.91184600 | -1.85158900 |
| H  | 2.98892300  | -1.59670000 | -1.79581900 |
| H  | 0.46707300  | 0.77420700  | 0.93103000  |
| H  | 2.47248100  | -0.99206000 | 0.74804200  |
| H  | 0.45417200  | -1.57180000 | 1.32685100  |
| H  | 2.81477300  | -3.41529300 | 1.32696500  |
| H  | 2.52946100  | -3.85234000 | -0.36400600 |
| H  | 4.68924600  | -2.26590700 | 0.55233900  |
| C  | -3.09339500 | 0.63073700  | -1.17559800 |



|   |             |             |             |
|---|-------------|-------------|-------------|
| C | -3.95641200 | 0.49531600  | 1.17740300  |
| H | -4.45571100 | 1.44131200  | 0.96196100  |
| H | -4.57561000 | -0.11445900 | 1.83703300  |
| H | -2.97960700 | 0.64614900  | 1.64525800  |
| C | -2.98696500 | -1.52026900 | 0.15511200  |
| H | -3.60575700 | -2.17378500 | 0.77216200  |
| H | -2.75812900 | -2.00578700 | -0.79400500 |
| H | -2.08125300 | -1.25948200 | 0.70671200  |
| C | -5.12363800 | -0.63591600 | -0.66089400 |
| H | -5.69880200 | 0.27037900  | -0.85604500 |
| H | -4.99350700 | -1.20062300 | -1.58520300 |
| H | -5.64100500 | -1.24995700 | 0.07687200  |
| N | -3.77356700 | -0.25894700 | -0.12012500 |
| H | -3.78227100 | 1.47151500  | -1.29369900 |
| H | -3.11219500 | 0.04638200  | -2.10090400 |

**TS2-3 (Esterification of GB3 + HCl + primary glycerol)**

|    |             |             |             |
|----|-------------|-------------|-------------|
| C  | 1.60140300  | -1.16643000 | -0.72272800 |
| C  | 0.41739900  | -0.31191100 | -1.19782600 |
| C  | -0.92267400 | -1.00016300 | -0.98266400 |
| O  | -0.91525200 | -2.27815300 | -1.27208500 |
| O  | -2.04156000 | -0.36591600 | -1.35768500 |
| C  | -2.20048100 | 1.07761200  | -1.31454500 |
| C  | -2.17173400 | 1.73707000  | 0.06839500  |
| O  | -0.84061300 | 2.12325100  | 0.41812100  |
| O  | -1.14930000 | -0.95649200 | 0.81262000  |
| C  | -3.02130900 | 3.02095400  | 0.05182400  |
| O  | -4.38660700 | 2.78932500  | -0.28484900 |
| Cl | 0.90845800  | 0.39212000  | 2.48674800  |
| Cl | -2.57469900 | -3.51544800 | 0.68691700  |
| H  | 1.48095800  | -2.17188000 | -1.13738000 |
| H  | 1.57224300  | -1.27956700 | 0.36393100  |
| H  | 0.38421000  | 0.66882600  | -0.72506000 |
| H  | 0.48295100  | -0.16128100 | -2.28545900 |
| H  | -1.65653400 | -2.81104700 | -0.76505700 |
| H  | -1.60085500 | -1.83507400 | 1.04927100  |
| H  | -1.44899600 | 1.54961500  | -1.95840100 |
| H  | -3.18669600 | 1.21676300  | -1.75852900 |
| H  | -0.40074600 | -0.71103100 | 1.43424400  |
| H  | -2.58027700 | 1.03572300  | 0.80371000  |
| H  | -0.53360400 | 1.67734100  | 1.23361200  |
| H  | -2.91827000 | 3.51125200  | 1.02790700  |
| H  | -2.63606600 | 3.71065800  | -0.70665400 |
| H  | -4.81802900 | 2.31516000  | 0.43849000  |
| C  | 2.97914800  | -0.68578100 | -1.18438900 |
| C  | 4.02870700  | -0.23686800 | 1.04956300  |
| H  | 4.54597400  | -1.18746700 | 0.91101100  |
| H  | 4.67337800  | 0.46844700  | 1.57593500  |
| H  | 3.09866300  | -0.35536700 | 1.61204200  |
| C  | 2.91345300  | 1.61163200  | -0.13197800 |
| H  | 3.55626000  | 2.35144500  | 0.34757900  |

|   |            |             |             |
|---|------------|-------------|-------------|
| H | 2.59795000 | 1.96938000  | -1.11270000 |
| H | 2.06228500 | 1.40266500  | 0.52009100  |
| C | 5.00548900 | 0.67570800  | -1.00823600 |
| H | 5.58727500 | -0.23748800 | -1.14166900 |
| H | 4.78382300 | 1.12154100  | -1.97893600 |
| H | 5.56484800 | 1.38364200  | -0.39604800 |
| N | 3.71567400 | 0.34357800  | -0.31176100 |
| H | 3.66922700 | -1.53187400 | -1.23460200 |
| H | 2.92663600 | -0.23589300 | -2.18076500 |

**P (Esterification of GB3 + HCl + primary glycerol)**

|    |             |             |             |
|----|-------------|-------------|-------------|
| C  | -1.63334400 | 0.50526900  | -1.49953400 |
| C  | -0.21984500 | -0.04495400 | -1.74995800 |
| C  | 0.81388600  | 1.05088500  | -1.54083500 |
| O  | 0.49784500  | 2.23275500  | -1.54870000 |
| O  | 2.09924700  | 0.73755600  | -1.35595400 |
| C  | 2.63289400  | -0.61611600 | -1.33928400 |
| C  | 2.59541800  | -1.25463900 | 0.04762300  |
| O  | 1.32715100  | -1.84466900 | 0.28451800  |
| O  | -1.46172500 | 1.66600300  | 1.62659600  |
| C  | 3.67580200  | -2.34491800 | 0.16497800  |
| O  | 5.00117200  | -1.84388800 | -0.01213700 |
| Cl | 0.14240400  | -0.72753300 | 2.81397500  |
| Cl | 0.65409500  | 4.41403000  | 0.62417200  |
| H  | -1.84711600 | 1.28537100  | -2.23578400 |
| H  | -1.65173900 | 1.00904600  | -0.52760400 |
| H  | 0.02537500  | -0.87979000 | -1.08882400 |
| H  | -0.12135200 | -0.40916000 | -2.78349300 |
| H  | 0.76003100  | 3.54435900  | -0.35421700 |
| H  | -0.97929900 | 2.50524500  | 1.62319100  |
| H  | 2.10823200  | -1.24508000 | -2.06528300 |
| H  | 3.66754500  | -0.48537300 | -1.65910600 |
| H  | -0.89530500 | 1.02556200  | 2.12266600  |
| H  | 2.79368500  | -0.46967500 | 0.79236700  |
| H  | 0.99355600  | -1.55489100 | 1.17937600  |
| H  | 3.55397100  | -2.84235600 | 1.13465900  |
| H  | 3.52913900  | -3.09900700 | -0.61582300 |
| H  | 5.25543700  | -1.34291800 | 0.77400500  |
| C  | -2.75166700 | -0.53828800 | -1.60553600 |
| C  | -3.85940600 | -0.13206200 | 0.60646200  |
| H  | -4.68071100 | 0.34012800  | 0.06411900  |
| H  | -4.23988200 | -0.64172000 | 1.49272700  |
| H  | -3.11124800 | 0.60484800  | 0.90825900  |
| C  | -2.09840300 | -1.84415000 | 0.45184000  |
| H  | -2.52268800 | -2.39037400 | 1.29474700  |
| H  | -1.58646800 | -2.53020700 | -0.22353300 |
| H  | -1.40560700 | -1.10349300 | 0.85208200  |
| C  | -4.26374900 | -2.20493300 | -0.63802100 |
| H  | -5.07747800 | -1.73012400 | -1.18853000 |
| H  | -3.80261100 | -2.98178300 | -1.24939600 |
| H  | -4.64677700 | -2.64214300 | 0.28446200  |

|   |             |             |             |
|---|-------------|-------------|-------------|
| N | -3.22917000 | -1.17223300 | -0.29216700 |
| H | -3.65327800 | -0.09102800 | -2.03212800 |
| H | -2.46074600 | -1.37887800 | -2.24324000 |
